# Supplementary material for: Bimetal–organic frameworks derived tuneable Co nanoparticles embedded in porous nitrogen-doped carbon nanorods as high-performance electromagnetic wave absorption materials
Source: Royal Society of Chemistry journal article supplement (doi:10.1039/d1tc00841b), 2021-01-01
Supplement: d1tc00841b1.pdf [file d1tc00841b1.pdf]

## Electronic Supplementary Information

### **Bimetal-organic frameworks derived tuneable Co nanoparticles embedded in porous nitrogen-doped carbon nanorods as high-performance electromagnetic wave absorption materials**

Jiannan Pan,<sup>a</sup> Huadong Yang,<sup>a</sup> Qu Hong,<sup>a</sup> Hui-Min Wen,<sup>a</sup> John Q. Xiao <sup>\*b</sup> and Jun Hu <sup>\*a</sup>

<sup>a</sup>College of Chemical Engineering, Zhejiang University of Technology, Hangzhou 310014, P. R. China. E-mail: hjzjut@zjut.edu.cn

<sup>b</sup>Department of Physics and Astronomy, University of Delaware, Newark, DE 19716, USA.

E-mail: jqx@udel.edu

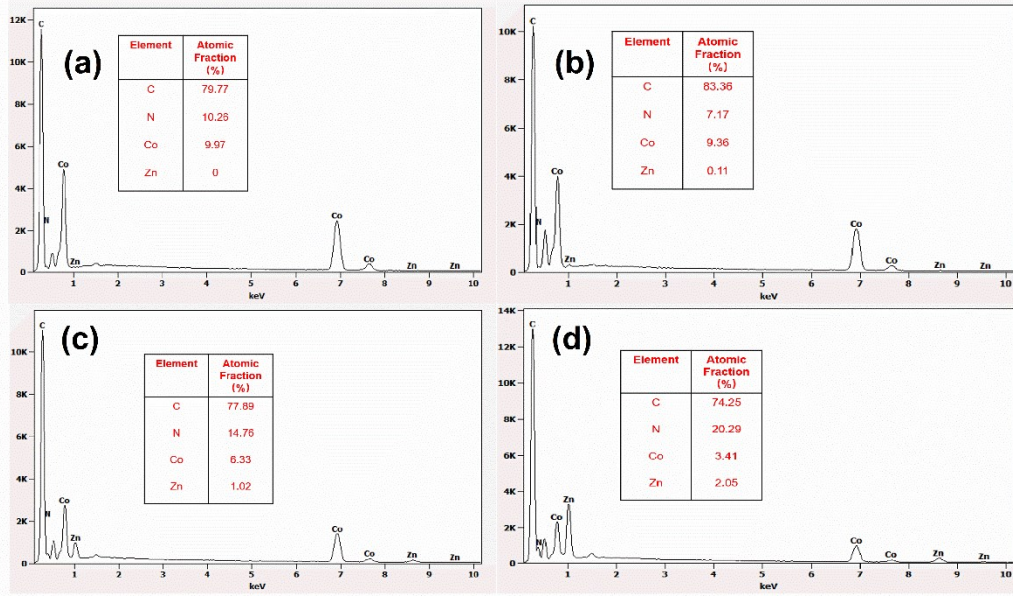

Fig. S1 EDS spectra of Co/NC-1 (a), Co/NC-2 (b), Co/NC-3 (c) and Co/NC-4 (d).

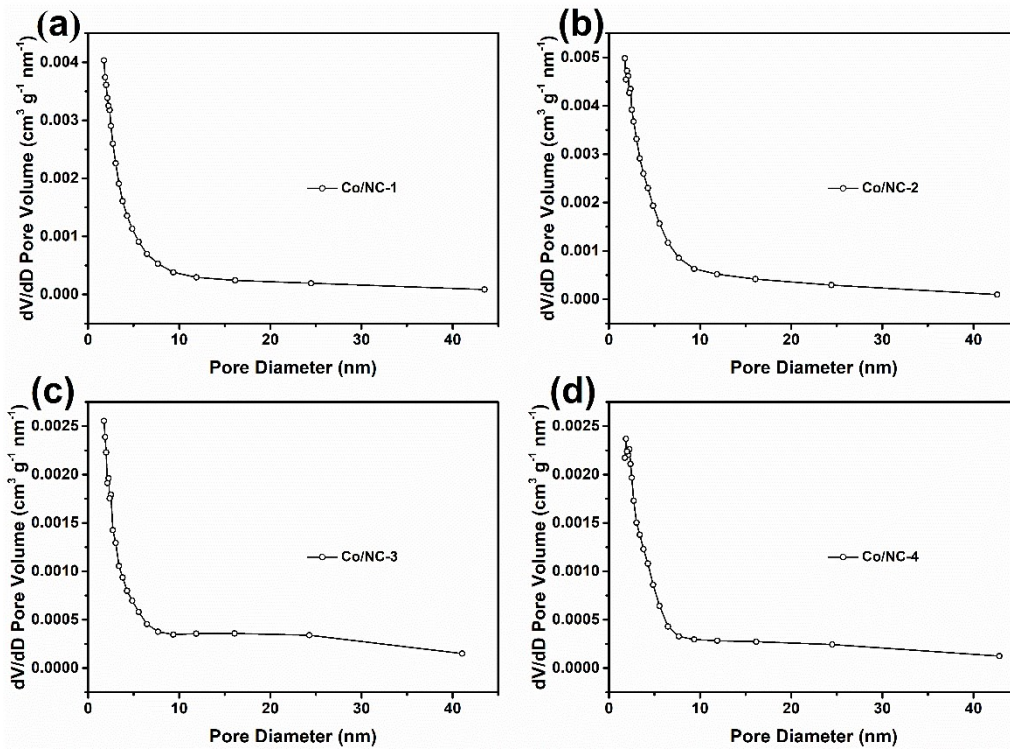

Fig. S2 Pore size distribution plots of Co/NC-1 (a), Co/NC-2 (b), Co/NC-3 (c) and Co/NC-4 (d).

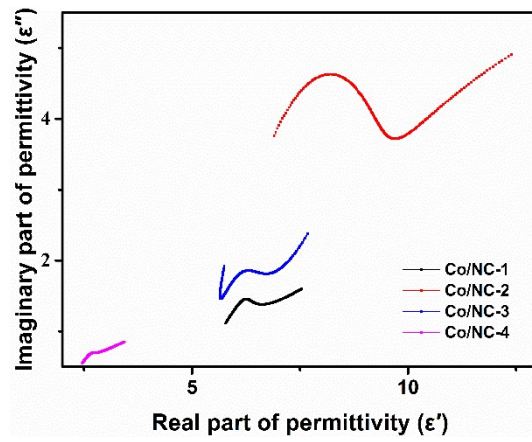

Fig. S3 Typical Cole-cole semicircles ( $\epsilon''$  vs  $\epsilon'$ ) of the Co/NC composites.

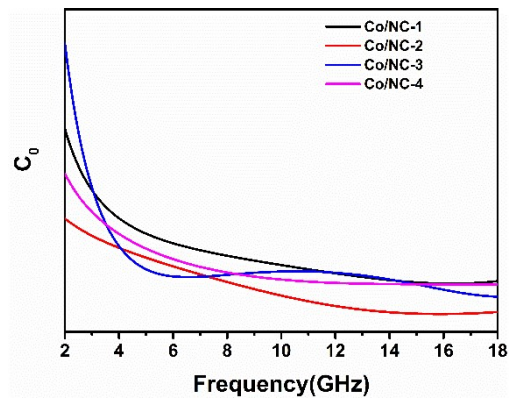

Fig. S4  $C_0$  curve of the Co/NC composites.
